# Supplementary material for: High Resolution Haplotype Analyses of Classical HLA Genes in Families With Multiple Sclerosis Highlights the Role of HLA-DP Alleles in Disease Susceptibility
Source: Front Immunol. 2021 May 25;12:644838. doi: 10.3389/fimmu.2021.644838 (PMC8240666; doi:10.3389/fimmu.2021.644838)
Supplement: Supplementary file 14 [file Table_13.xlsx]

## Sheet: Supplemental Table 13
A: Summany
CaseControl	Category	Sample Count	Risk Score	Mean Risk Score	Protective Score	Mean Protective Score
Case	Risk	178	228	1.2809	-10	-0.0561798
	Neutral Zero	77	0	0	0	0
	Neutral Risk Protective	81	82	1.01235	-82	-1.01235
	Protective Risk	14	14	1	-28	-2
	Protective	127	0	0	-176	-1.38583
Control	Risk	274	309	1.12774	-9	-0.0328467
	Neutral Zero	382	0	0	0	0
	Neutral Risk Protective	210	212	1.00952	-212	-1.00952
	Protective Risk	77	77	1	-160	-2.07792
	Protective	1086	0	0	-1699	-1.56446
In Category column, we classified subjects into 5 categories for both cases and controls
1) Risk (positive score); 2) Neutral Zero (no risk and protective factor present); 3) Neutral Risk Protective (equivalent numbers of risk and protective factors);
4) Protective Risk (negative score, but at least one copy of risk allele present); 5) Protective (protective allele only)
"Sample Count" column shows the number of subjects that are in each category
Each risk allele is scored as +1 and protective allele is scored as -1. "Risk Score" and "Protective Score" show the sum of the risk and protective scores, respectively.
B. 2 x 2 odds ratio for Risk vs. Neutral Zero
	Case	Control
Risk	178	274
Neutral Zero	77	382
OR		3.22286
Yates p-value		< 1.00E-04
C. Protective vs. Neutral Zero
	Case	Control
Protective	127	1086
Neutral Zero	77	382
OR		0.580158
Yates p-value		0.0006
D. Neutral Risk Protective vs. Neutral Zero
	Case	Control
Neutral Risk Protective	81	210
Neutral Zero	77	382
OR		1.91354
Yates p-value		0.00042
